# Supplementary material for: A Naked-Eye Visible Colorimetric and Ratiometric Chemosensor Based on Schiff Base for Fluoride Anion Detection
Source: Preprints.org preprint supplement (doi:10.20944/preprints202012.0155.v1), 2020-12-07
Supplement: Supplementary file 1 [file supplementary]

**Electronic Supplementary Information (ESI)**

**A Naked-Eye Visible Colorimetric and Ratiometric Chemosensor Based on Schiff Base for Fluoride Anion Detection**

Liu Yang1,†, Yu-Long Liu1,†, Cheng-Guo Liu2, Ying Fu1,* , Fei Ye1,*

1 Department of Applied Chemistry, College of Arts and Sciences, Northeast Agricultural University, Harbin, 150030, People’s Republic of China.

2 Department of State Assets Management, Northeast Agricultural University, Harbin, 150030, People’s Republic of China.

* Corresponding author. Tel.: +86-451-55190070. E-mail address: fuying@neau.edu.cn

yefei@neau.edu.cn

† These authors contributed equally to this work.

**Figure S1.** 1H NMR of Compound **2**.

**Figure S2.** 1H NMR of Compound **3**.


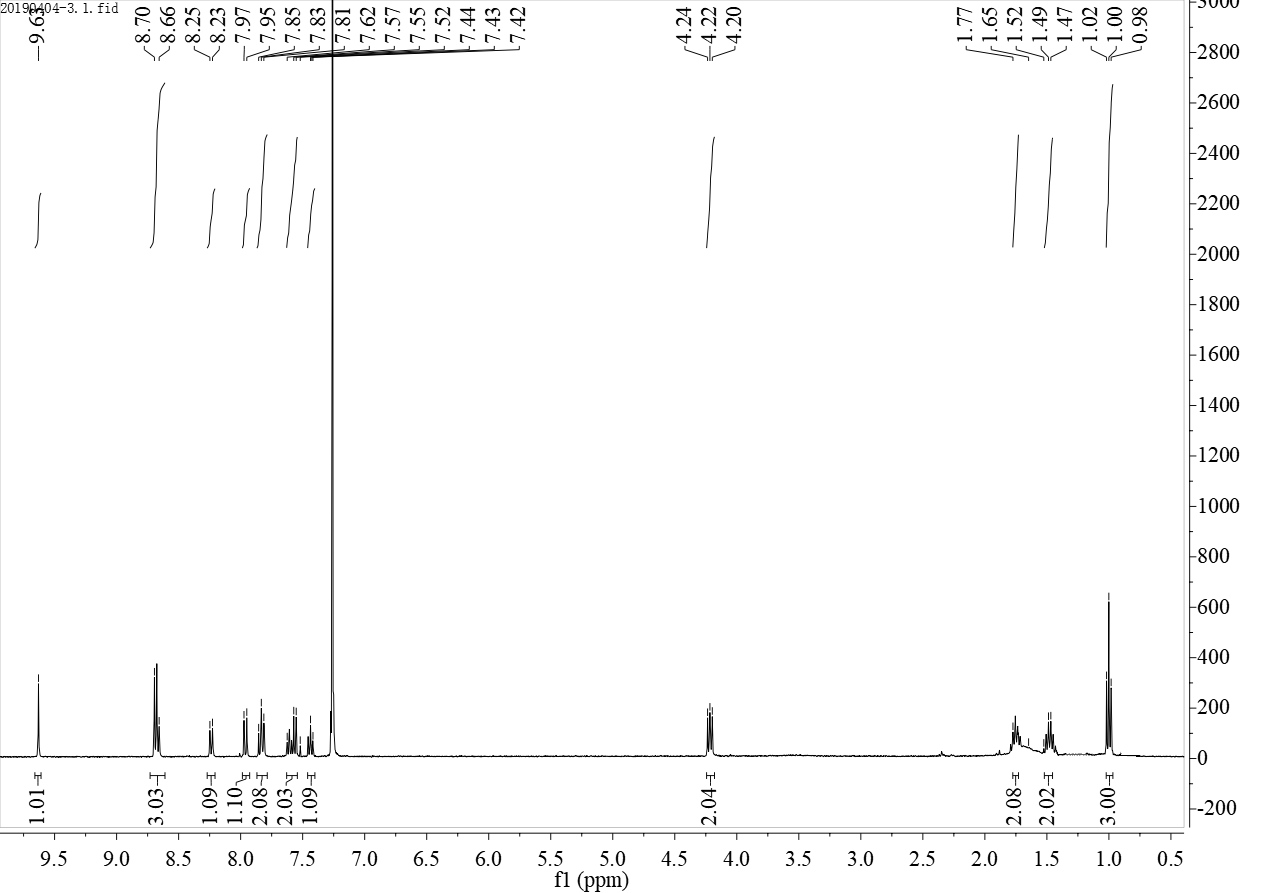


**Figure S3.** 1H NMR of **HNA**.

**Figure S4.** HRMS of **HNA**.**
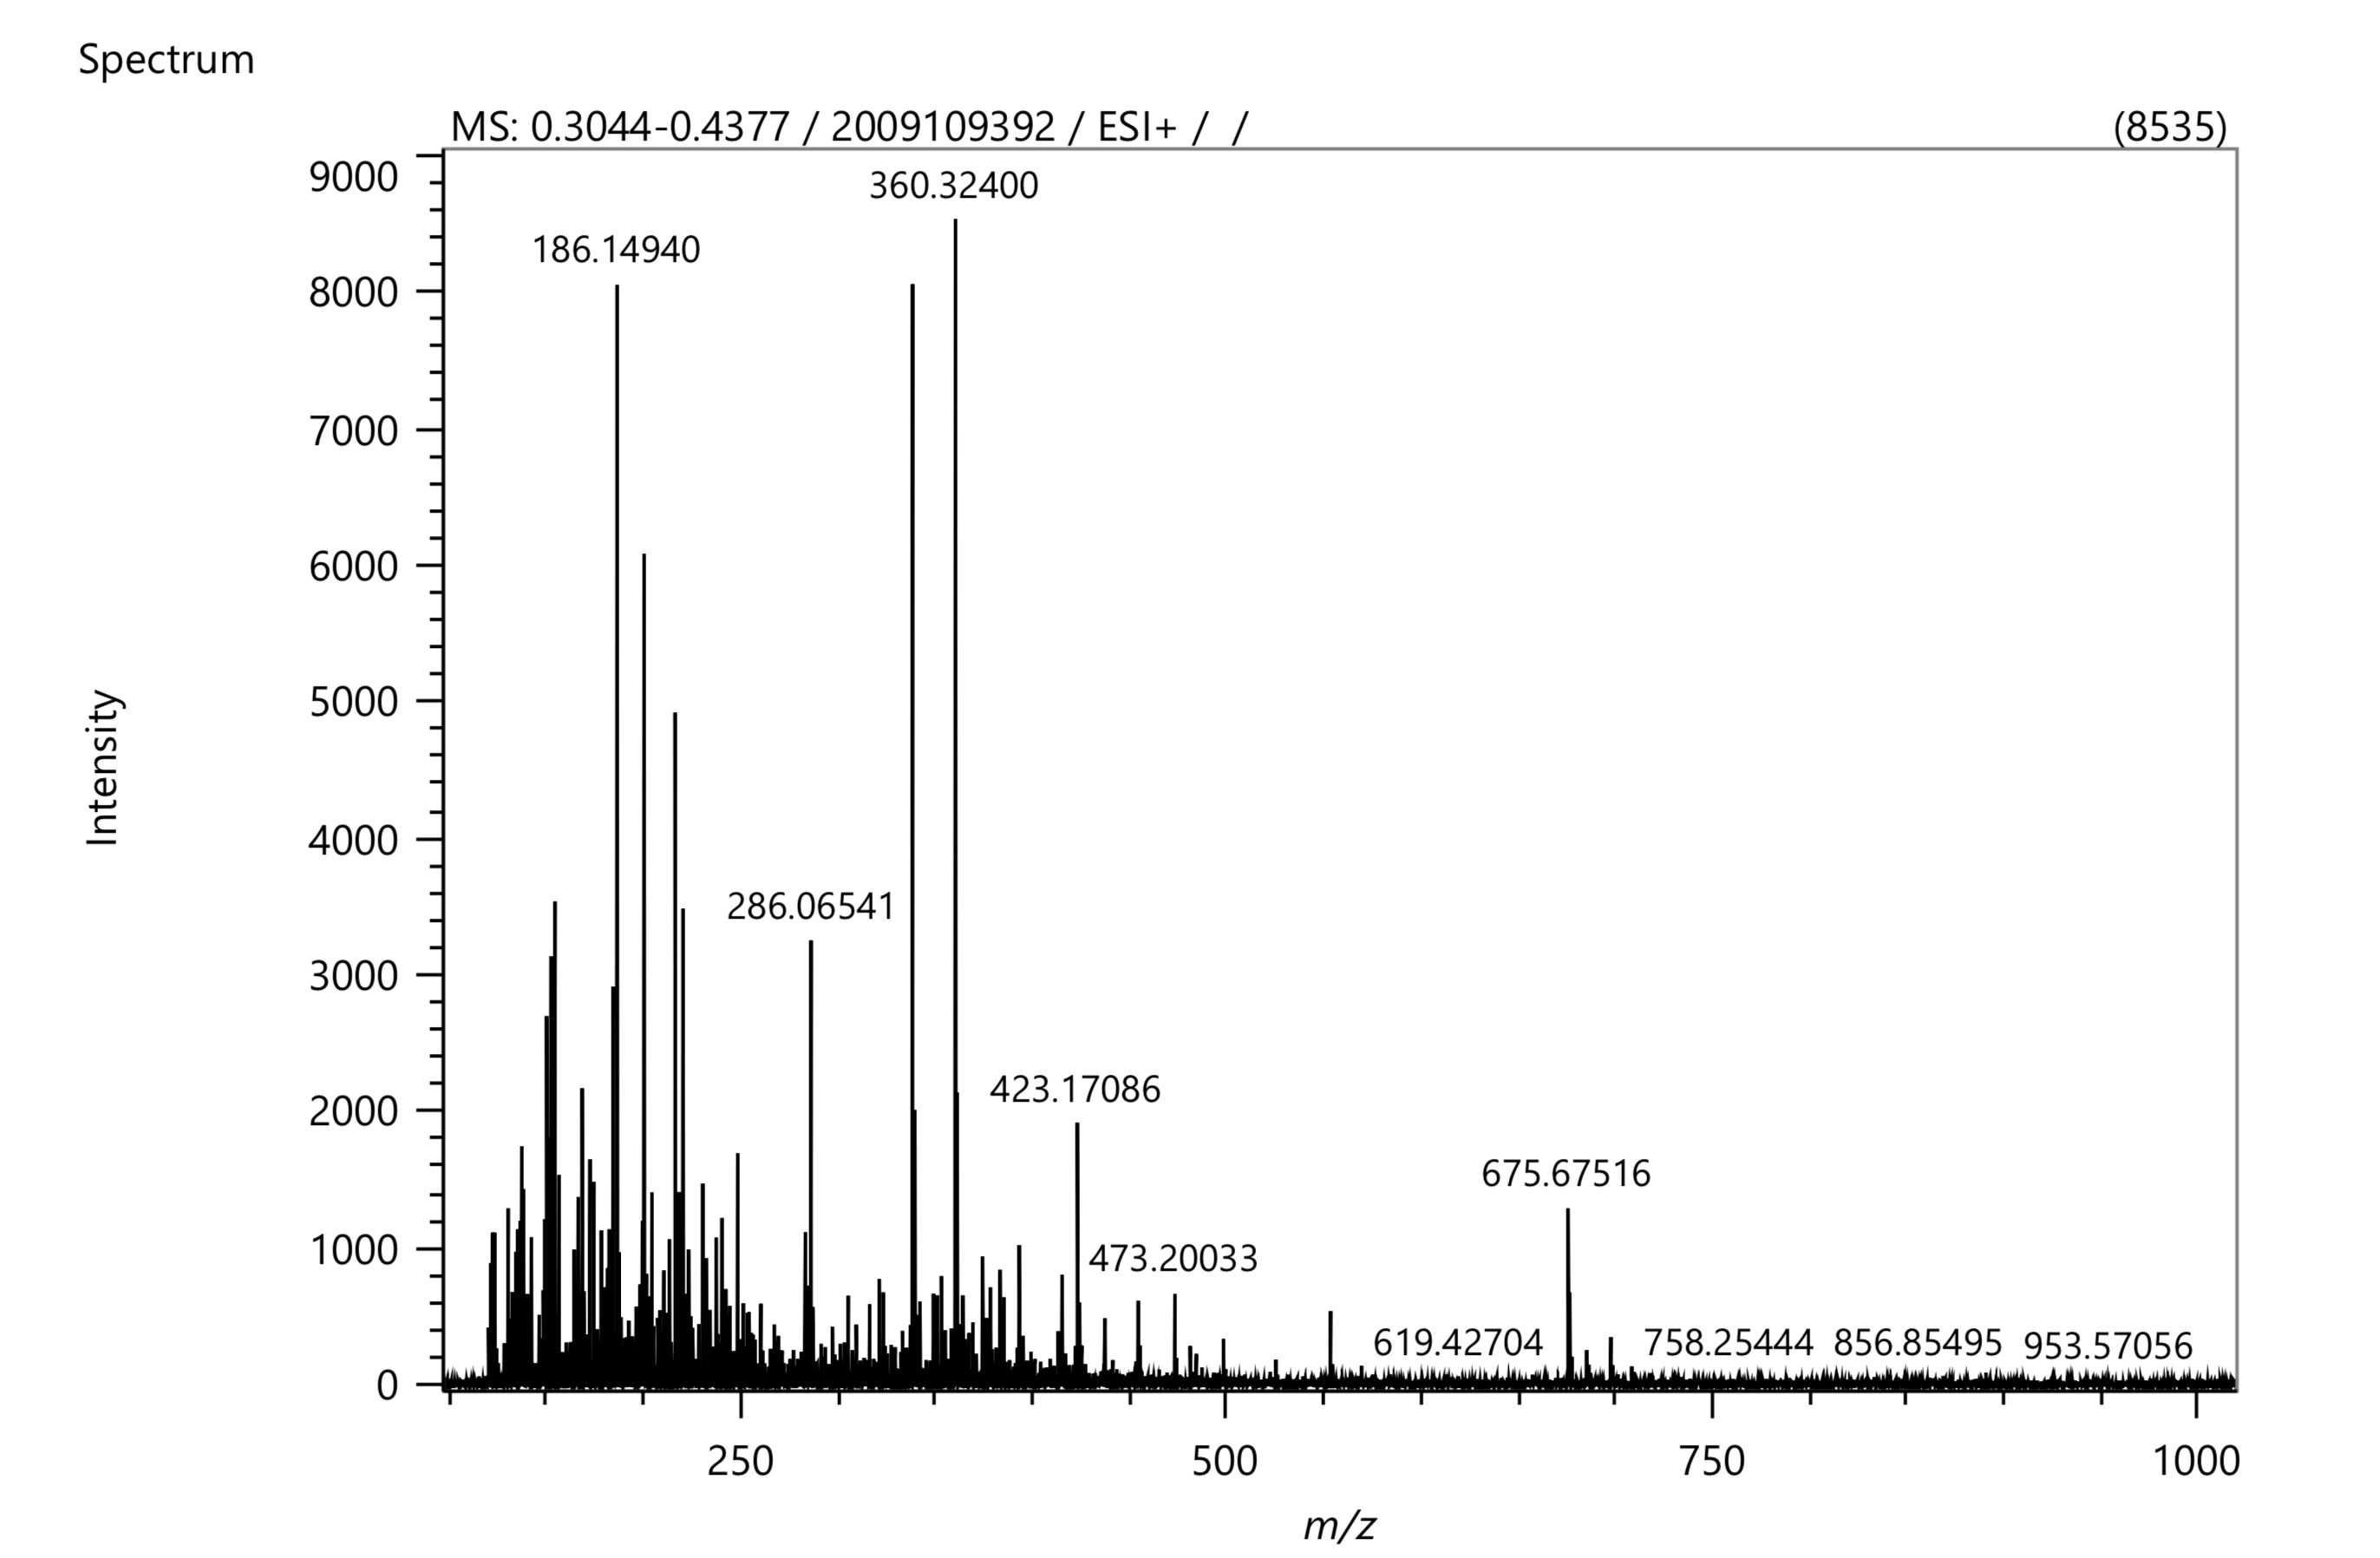
**
